# Protective Ventilation Influences Systemic Inflammation after Esophagectomy

## A Randomized Controlled Study

Pierre Michelet, M.D.,\* Xavier-Benoît D'Journo, M.D.,† Antoine Roch, M.D., Ph.D.,‡ Christophe Doddoli, M.D.,§ Valerie Marin, M.D.,|| Laurent Papazian, M.D., Ph.D.,# Isabelle Decamps, M.D.,\* Fabienne Bregeon, M.D., Ph.D.,\*\* Pascal Thomas, M.D.,†† Jean-Pierre Auffray, M.D.‡‡

**Background:** Esophagectomy induces a systemic inflammatory response whose extent has been recognized as a predictive factor of postoperative respiratory morbidity. The aim of this study was to determine the effectiveness of a protective ventilatory strategy to reduce systemic inflammation in patients undergoing esophagectomy.

**Methods:** The authors prospectively investigated 52 patients undergoing planned esophagectomy for cancer. Patients were randomly assigned to a conventional ventilation strategy ( $n = 26$ ; tidal volume of 9 ml/kg during two-lung and one-lung ventilation; no positive end-expiratory pressure) or a protective ventilation strategy ( $n = 26$ ; tidal volume of 9 ml/kg during two-lung ventilation, reduced to 5 ml/kg during one-lung ventilation; positive end-expiratory pressure 5 cm H<sub>2</sub>O throughout the operative time).

**Results:** Plasmatic levels of interleukin (IL)-1 $\beta$ , IL-6, IL-8, and tumor necrosis factor  $\alpha$  were measured perioperatively and postoperatively. Pulmonary function and postoperative evolution were also evaluated. Patients who received protective strategy had lower blood levels of IL-1 $\beta$ , IL-6, and IL-8 at the end of one-lung ventilation (0.24 [0.15–0.40] vs. 0.56 [0.38–0.89] pg/ml,  $P < 0.001$ ; 91 [61–117] vs. 189 [127–294] pg/ml,  $P < 0.001$ ; and 30 [22–45] vs. 49 [29–69] pg/ml,  $P < 0.05$ , respectively) and 18 h postoperatively (0.18 [0.13–0.30] vs. 0.43 [0.34–0.54] pg/ml,  $P < 0.001$ ; 54 [36–89] vs. 116 [78–208] pg/ml,  $P < 0.001$ ; 16 [11–24] vs. 35 [28–53] pg/ml,  $P < 0.001$ , respectively). Protective strategy resulted in higher oxygen partial pressure to inspired oxygen fraction ratio during one-lung ventilation and 1 h postoperatively and in a reduction of postoperative mechanical ventilation duration (115  $\pm$  38 vs. 171  $\pm$  57 min,  $P < 0.001$ ).

**Conclusion:** A protective ventilatory strategy decreases the proinflammatory systemic response after esophagectomy, improves lung function, and results in earlier extubation.

ESOPHAGECTOMY is a major surgical procedure requiring a prolonged period of one-lung ventilation (OLV). This procedure is marked by an important inflammatory response<sup>1–3</sup>; the extent of this response and the occurrence of perioperative hypoxemia have been recognized as predictive factors of postoperative respiratory morbidity.<sup>4,5</sup>

In patients with acute respiratory distress syndrome,

mechanical ventilation with low tidal volume ( $V_T$ ) and positive end-expiratory pressure (PEEP) has been shown to reduce pulmonary and systemic cytokine release and to improve gas exchange and outcome.<sup>6–8</sup> In patients with normal lungs, two studies have suggested that applying PEEP and reducing  $V_T$  did not influence plasma cytokine release during mechanical ventilation for elective surgery.<sup>9,10</sup> However, animal studies have reported that conventional mechanical ventilation may activate cytokine response even without preexisting lung injury<sup>11</sup> and that it may induce the development of further lung injury when applied after lipopolysaccharide injection.<sup>12</sup> Moreover, it seems that, during OLV,  $V_T$  is frequently maintained at the same level as during two-lung ventilation without PEEP.<sup>13,14</sup> This maintenance corresponds to a high-volume ventilation with potentially deleterious effects even for a period of less than 90 min.<sup>5,15</sup> Recent experimental data have demonstrated a potential reduction of such phenomenon by using reduced  $V_T$  and PEEP.<sup>15</sup> Therefore, the benefits of a protective ventilatory strategy in a selected population of patients without preexisting lung disease and undergoing a major thoracic-abdominal surgery such as esophagectomy could be enhanced.

The aim of this prospective, randomized study was to determine whether a ventilatory strategy based on the reduction of  $V_T$  during OLV and a moderate level of PEEP could reduce the systemic proinflammatory cytokine response associated with esophagectomy. Its impact on oxygenation, extravascular lung water amount, and duration of postoperative mechanical ventilation was also evaluated.

## Materials and Methods

### Study Population

The protocol was approved by the ethics committee of the hospital (comité consultatif de protection des biens et des personnes en recherche biomédicale de Marseille 1, France), and informed consent was obtained from each patient. Eligible patients met the following criteria: (1) age 18 yr or older, (2) planned esophagectomy for esophageal cancer, and (3) acceptance of postoperative thoracic epidural analgesia. Exclusion criteria included New York Heart Association class III or IV, preexisting chronic obstructive pulmonary disease with forced expiratory volume in 1 s of

\* Assistant Professor, ‡‡ Professor, Département d'Anesthésie Réanimation, † Assistant Professor, § Associate Professor, †† Professor, Service de Chirurgie Thoracique, ‡ Assistant Professor, # Professor, Service de Réanimation Médicale, || Associate Professor, Laboratoire d'Immunologie, Hôpital Sainte Marguerite, Marseille, France. \*\* Associate Professor, Laboratoire de physiologie Respiratoire, UPRES EA 2201, Université de la Méditerranée, France.

Received from the Département d'Anesthésie Réanimation, Hôpital Sainte Marguerite, Marseille, France. Submitted for publication January 26, 2006. Accepted for publication June 26, 2006. Supported by a grant from the Association Régionale d'Assistance Respiratoire à Domicile, La Penne sur Huveaune, France.

Address correspondence to Dr. Michelet: Réanimation Polyvalente, Hôpital Sainte-Marguerite, 13274 Marseille Cedex 9, France. pierre.michelet@mail-ap-hm.fr. Individual article reprints may be purchased through the Journal Web site, www.anesthesiology.org.

less than 80% of predicted and/or forced expiratory volume in 1 s over forced vital capacity ratio of less than 0.7,<sup>16</sup> chronic renal failure (serum creatinine > 200  $\mu\text{M}$ ), altered liver function (Child-Pugh class B or more), preoperative corticosteroid treatment during the month before inclusion or a preoperative acute infection suspected because of a temperature greater than 38°C or less than 36°C, leukocyte count greater than  $10 \times 10^9$  or less than  $4 \times 10^9$ , or any new pulmonary infiltrate on the systematic chest radiograph.

### Patient Treatment

Anesthetic and surgical management were standardized for each patient. Anesthesia was induced and maintained with propofol, sufentanil, and cisatracurium. After tracheal intubation with a double-lumen tube (Mallinckrodt, Athlone, Ireland), under fiberoptic bronchoscopy, mechanical ventilation was initiated (Julian®; Dräger, Lübeck, Germany) and the respiratory rate was adjusted to keep arterial blood carbon dioxide partial pressure ( $\text{Paco}_2$ ) between 35 and 45 mmHg throughout anesthesia. The initial inspired oxygen fraction ( $\text{Fio}_2$ ) was 0.5 using oxygen-and-air mixture and was increased if necessary to keep a transcutaneous saturation greater than 90%. A warming blanket system and fluid warmers were used to prevent hypothermia during surgery. Standardized fluid replacement consisted of 10 ml/kg ideal body weight lactated Ringer's solution (RL; B. Braun, Melsungen, Germany) preoperatively, followed by 10 ml  $\cdot \text{kg}^{-1} \cdot \text{h}^{-1}$  perioperatively. If mean arterial pressure was lower than 70 mmHg for more than 5 min, an additional fluid challenge was achieved with 10 ml/kg hydroxyethyl starch (Voluven®; Fresenius Kabi, Bad Homburg, Germany) eventually repeated once.

The same experienced surgeons (C.D., P.T.; 25–30 transthoracic esophagectomies per year) both conducted each operation and were blinded to the strategy used.<sup>17</sup> Surgical procedures included, first, a median laparotomy with confection of a neoesophagus using the stomach and, second, a right thoracotomy with right pulmonary exclusion in lateral decubitus allowing subtotal esophagectomy combined with two fields lymphadenectomy and esophageal reconstruction through the thoracic route.<sup>18</sup>

After surgery, all patients were transferred to an intensive care unit. Extubation was performed when patients met the following extubation criteria: (1) temperature greater than 36°C, (2) mean arterial pressure greater than 70 mmHg, (3) arterial oxygen partial pressure ( $\text{Pao}_2$ )/ $\text{Fio}_2$  ratio greater than 200 mmHg with hemoglobin level greater than 8 g/dl, (4) ratio of respiratory frequency to  $\text{V}_T$  less than  $105 \text{ breaths} \cdot \text{min}^{-1} \cdot \text{l}^{-1}$  under 10 cm  $\text{H}_2\text{O}$  pressure support and 5 cm  $\text{H}_2\text{O}$  PEEP, and (5) adequate cough during suctioning. Patients were cared for by attending physicians not involved in the protocol and blinded to the allocated group.

### Study Protocol

Before anesthetic induction, patients were randomly assigned by a concealed allocation approach using opaque sealed envelopes containing the randomization schedule. Randomization was realized by computer-generated codes maintained in sequentially numbered, opaque envelopes that were opened before induction of general anesthesia. Patients received either a conventional ventilation (CV) or a protective ventilation (PV) strategy. The CV strategy used a  $\text{V}_T$  of 9 ml/kg predicted body weight and no PEEP throughout the intervention (*i.e.*, during two-lung and one-lung ventilation). The PV strategy used a  $\text{V}_T$  of 9 ml/kg during the two-lung ventilation with a reduction to 5 ml/kg during OLV associated with 5 cm  $\text{H}_2\text{O}$  PEEP throughout the operative time (*i.e.*, during two-lung and one-lung ventilation). PEEP was removed for the transfer in the intensive care unit and was only applied again in both groups after the patient was under pressure support before extubation. The predicted body weight of male patients was calculated as equal to  $50 + 0.91$  (centimeters of height-152.4), that of female patients was calculated as equal to  $45.5 + 0.91$  (centimeters of height-152.4).<sup>8</sup> In both strategies, neither continuous positive airway pressure on the excluded lung nor recruitment maneuver was used. In case of perioperative hypoxemia, the only treatment used was an increase in  $\text{Fio}_2$ . The anesthesiologists were not blinded to the strategy used, but they were not implicated in the collection of the data.

Six sets of measurements were successively obtained:  $T_{\text{Baseline}}$ , baseline time after anesthetic induction, hemodynamic and respiratory stabilization, and before ventilatory strategy application;  $T_{\text{Abdo}}$ , at the end of abdominal time;  $T_{\text{OLV } 15}$  and  $T_{\text{OLV End}}$ , 15 min after initiation and at the end of OLV, respectively;  $T_{\text{Postop } 1}$  and  $T_{\text{Postop } 18}$ , 1 and 18 h after the end of the surgical procedure, respectively.

### Measurements

According to the extensive use of interleukin (IL)-6 as a marker both of surgical-induced injury and of ventilator-induced lung injury,<sup>1,19–21</sup> the primary endpoint was the change of IL-6 level related to the ventilatory strategy used. To confirm the changes observed with IL-6, several others cytokines (tumor necrosis factor  $\alpha$  [ $\text{TNF-}\alpha$ ], IL-1 $\beta$ , and IL-8) implicated in the proinflammatory response after esophagectomy were also studied. Arterial blood samples for measurement of serum  $\text{TNF-}\alpha$ , IL-1 $\beta$ , IL-6, and IL-8 were collected at  $T_{\text{Baseline}}$ ,  $T_{\text{Abdo}}$ ,  $T_{\text{OLV End}}$ , and  $T_{\text{Postop } 18}$ . Samples were collected into nonpyrogenic, sterile falcon tubes. Serum was separated by cold centrifugation of the blood at 1,500g for 10 min and stored at  $-70^\circ\text{C}$ . To improve the homogeneity of measurements, all of the samples were analyzed at the same time with the same assay reagents by the same laboratory technician blinded to the strategy used. Serum  $\text{TNF-}\alpha$ , IL-1 $\beta$ , IL-6, and IL-8 were measured using enzyme-linked immunosorbent assay (human  $\text{TNF-}\alpha$ , IL-1 $\beta$ ,

IL-8 Immunoassay Quantikine [R&D Systems, Inc., Minneapolis, MN] and IL-6 enzyme-linked immunosorbent assay [Immunotech, Beckman-Coulter, Villepinte, France]). The lower detection limits for these kits are 5, 0.1, 10, and 6 pg/ml, respectively.

Secondary endpoints included the  $\text{PaO}_2/\text{FiO}_2$  ratio, the amount of extravascular lung water indexed to the body weight (EVLWI), and the ratio of EVLWI to intrathoracic blood volume indexed to body weight as an indicator of pulmonary permeability.<sup>22</sup> At  $T_{\text{Baseline}}$ ,  $T_{\text{Postop } 1}$ , and  $T_{\text{Postop } 18}$ , the transpulmonary double-indicator dilution method was used to measure cardiac index, intrathoracic blood volume indexed to body weight, and EVLWI as described previously.<sup>23</sup> Dilution curves for 25 mg indocyanine green (Infracyanine®; SERB, Paris, France) dissolved in 12.5 ml iced 5% glucose were recorded in the descending aorta using a thermistor-tipped fiberoptic arterial catheter (Pulsiocath PV2024-4F; Pulsion Medical Systems, Munich, Germany) advanced *via* the femoral artery. Cardiac index and volumes were determined by a computer (COLD-Z-021; Pulsion Medical Systems, Munich, Germany). An average was calculated from three measurements performed at random moments during the ventilatory cycle.

#### Power and Statistical Analysis

Data were analyzed using the SPSS 12.0 package (SPSS Inc., Chicago, IL). Based on previous data,<sup>24,25</sup> the cal-

culated sample size was 24 subjects per group to detect a difference in mean IL-6 concentration of 50%, an estimated SD of 60%, with a power of 80% and a 5% risk of type I error. Results are expressed as mean  $\pm$  SD or median [interquartile range] for quantitative variables and as percentage for qualitative variables. The Student *t* test or Mann-Whitney U test was used for quantitative variables. The Pearson chi-square or Fisher exact test was applied for qualitative variables. Two-way repeated-measures analysis of variance followed by a Tukey *post hoc* test was used to evaluate the effects of time, ventilation strategy, and interaction. Cytokine levels were compared after  $\log_{10}$  transformation.  $P < 0.05$  was considered statistically significant.

## Results

### Patients

From September 2002 to December 2004, patients were consecutively recruited from the thoracic surgical unit of the University Hospital of Sainte Marguerite, Marseille, France. Of the 55 eligible patients, 52 were randomized and, according to an intention-to-treat analysis, were finally analyzed (fig. 1). Demographic and intraoperative characteristics did not differ between groups (tables 1 and 2). Among the patients studied, there was no patient treated with drugs potentially affecting cyto-

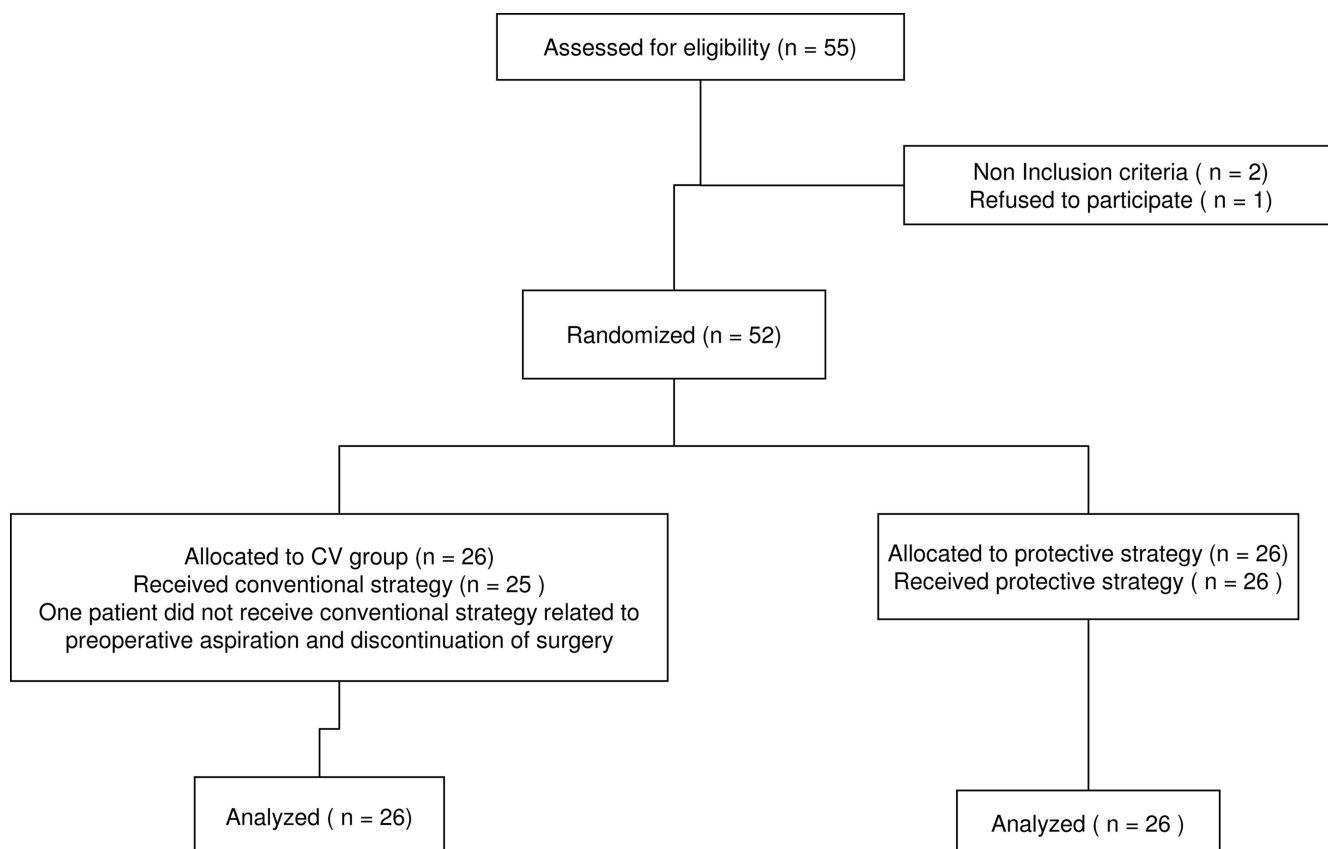

Fig. 1. Flow diagram of subjects. CV = conventional ventilation.

**Table 1. Characteristics of the Patients at Study Inclusion before Randomization**

|                                         | Conventional Ventilation (n = 26) | Protective Ventilation (n = 26) | P Value |
|-----------------------------------------|-----------------------------------|---------------------------------|---------|
| Age, yr                                 | 60 ± 8.5                          | 61 ± 10                         | 0.69    |
| Sex, M/F                                | 22/4                              | 21/5                            | 0.99    |
| Body mass index, kg/m <sup>2</sup>      | 24 ± 3.5                          | 24 ± 4                          | 0.99    |
| ASA physical status, n (%)              |                                   |                                 |         |
| I                                       | 6 (24)                            | 6 (24)                          | 0.92    |
| II                                      | 17 (65)                           | 16 (61)                         |         |
| III                                     | 3 (11)                            | 4 (15)                          |         |
| NYHA, n (%)                             |                                   |                                 |         |
| I                                       | 13 (50)                           | 10 (38)                         | 0.30    |
| II                                      | 10 (38)                           | 15 (58)                         |         |
| III                                     | 3 (11)                            | 1 (4)                           |         |
| Weight loss, kg                         | 3.5 ± 4.5                         | 4 ± 6                           | 0.74    |
| Previous chemotherapy–radiation therapy | 10 (46%)                          | 11 (42%)                        | 0.99    |
| Smoking history, n (pack/yr)            | 18 (32 ± 24)                      | 20 (37 ± 20)                    | 0.75    |
| FEV <sub>1</sub> , % predicted          | 96 ± 18                           | 93 ± 19                         | 0.56    |
| FVC, % predicted                        | 99 ± 13                           | 98 ± 14                         | 0.79    |
| Pao <sub>2</sub> , % predicted          | 94 ± 12                           | 93 ± 13                         | 0.77    |
| Tumour histology, n (%)                 |                                   |                                 |         |
| Adenocarcinoma                          | 15 (56)                           | 16 (60)                         | 0.99    |
| Squamous cell                           | 11 (44)                           | 10 (40)                         |         |
| Stage pTNM (UICC), n (%)                |                                   |                                 |         |
| I                                       | 7 (28)                            | 7 (28)                          | 0.77    |
| IIA                                     | 7 (24)                            | 5 (20)                          |         |
| IIB                                     | 3 (12)                            | 6 (20)                          |         |
| III                                     | 9 (36)                            | 8 (32)                          |         |

Data are expressed as mean ± SD unless otherwise noted.

ASA = American Society of Anesthesiologists; FEV<sub>1</sub> = forced expiratory volume in 1 s; FVC = forced vital capacity; NYHA = New York Heart Association; Pao<sub>2</sub> = partial pressure of oxygen.

kine kinetics and action (antiinflammatory drugs, corticosteroids).

#### Cytokine Blood Levels

A marked inflammatory response occurred during and after esophagectomy. Indeed, analysis of variance revealed an increase over time in blood levels of all cytokines (fig. 2) except TNF- $\alpha$ , which remained below the detection level of 5 pg/ml throughout the study (data not shown). Concentrations of IL-1 $\beta$ , IL-6, and IL-8 were significantly higher at T<sub>Abdo</sub>, T<sub>OLV End</sub>, and T<sub>Postop 18</sub> as compared with T<sub>Baseline</sub>. The PV strategy resulted in less systemic inflammation from the end of OLV to the postoperative period compared with the CV strategy. Indeed IL-1 $\beta$ , IL-6, and IL-8 levels were lower in the PV group at T<sub>OLV End</sub> (0.24 [0.15–0.40] vs. 0.56 [0.38–0.89] pg/ml,  $P$

< 0.001; 91 [61–117] vs. 189 [127–294] pg/ml,  $P$  < 0.001; and 30 [22–45] vs. 49 [29–69] pg/ml,  $P$  < 0.05, respectively) and at T<sub>Postop 18</sub> (0.18 [0.13–0.30] vs. 0.43 [0.34–0.54] pg/ml,  $P$  < 0.001; 54 [36–89] vs. 116 [78–208] pg/ml,  $P$  < 0.001; and 16 [11–24] vs. 35 [28–53] pg/ml,  $P$  < 0.001, respectively) (fig. 2).

#### Pulmonary and Hemodynamic Variables

The PV strategy resulted in better oxygenation preservation. Indeed, whereas Pao<sub>2</sub>/Fio<sub>2</sub> ratio significantly decreased over time and was the lowest during OLV, it was higher in the PV group from T<sub>OLV 15</sub> to T<sub>Postop 1</sub> (fig. 3). Paco<sub>2</sub> increased in both groups from T<sub>Abdo</sub> to T<sub>OLV End</sub> as compared with baseline values and was higher in the PV group at T<sub>OLV 15</sub> and T<sub>OLV End</sub> despite an increase in respiratory rate (table 3). Similarly, plateau airway pres-

**Table 2. Intraoperative Data of the Patients**

|                                                    | Conventional Ventilation (n = 25) | Protective Ventilation (n = 26) | P Value |
|----------------------------------------------------|-----------------------------------|---------------------------------|---------|
| Surgery duration, min                              | 295 ± 54                          | 309 ± 71                        | 0.43    |
| One-lung ventilation duration, min                 | 89 ± 29                           | 85 ± 29                         | 0.59    |
| Perioperative mechanical ventilation duration, min | 591 ± 94                          | 574 ± 82                        | 0.49    |
| Perioperative blood loss, ml                       | 629 ± 301                         | 664 ± 325                       | 0.68    |
| Perioperative urine output, ml                     | 1,031 ± 615                       | 1,021 ± 519                     | 0.95    |
| Perioperative fluid administration, l              | 7.8 ± 1.9                         | 7.8 ± 2.1                       | 0.99    |
| Perioperative transfusions, events                 | 4 (15%)                           | 6 (23%)                         | 0.72    |
| Perioperative transfusions, units                  | 0.3 ± 0.7                         | 0.5 ± 0.9                       | 0.37    |

Data are expressed as mean ± SD unless otherwise noted.



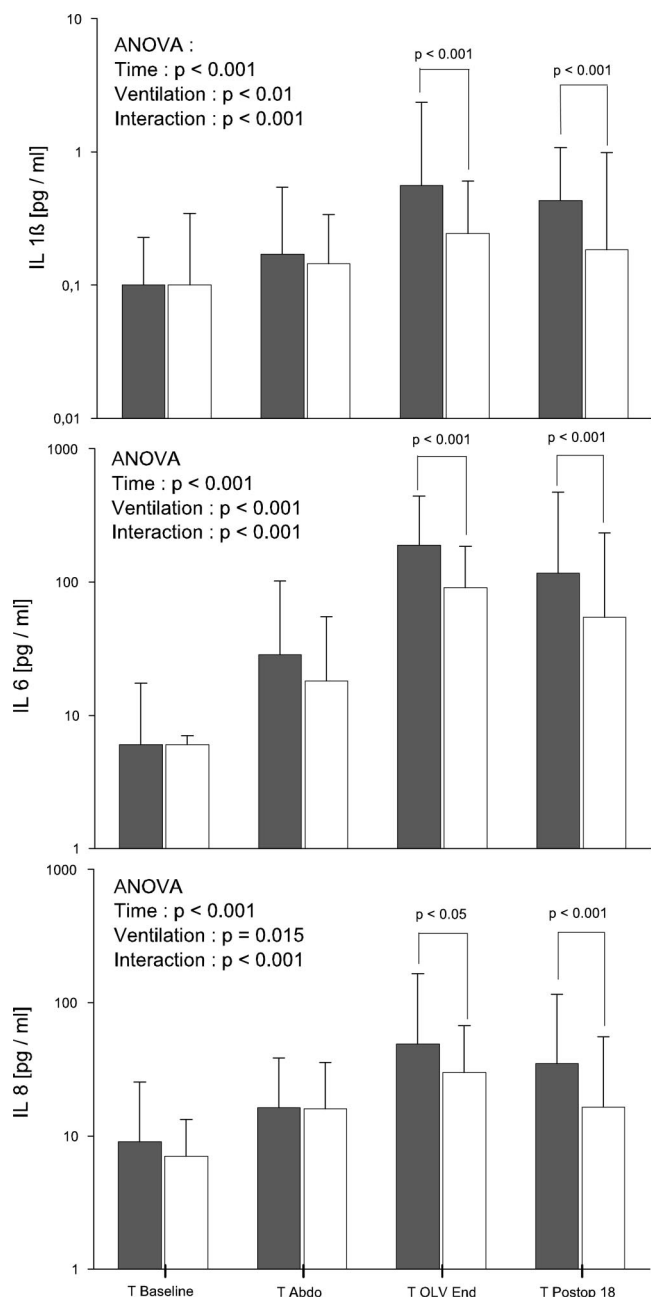

**Fig. 2.** Time course of blood cytokine levels in conventional ventilation group (gray bars) and protective ventilation group (white bars) at baseline ( $T_{\text{Baseline}}$ ), at the end of abdominal time ( $T_{\text{Abdo}}$ ), at the end of one-lung ventilation time ( $T_{\text{OLV End}}$ ), and 18 h postoperatively ( $T_{\text{Postop 18}}$ ). Data are expressed as median and 90th percentile. ANOVA = analysis of variance; IL = interleukin.

sure increased from  $T_{\text{OLV 15}}$  to  $T_{\text{Postop 1}}$  but was lower in the PV group during the OLV period (table 3). Heart rate and cardiac index increased with time in both groups from  $T_{\text{OLV End}}$  to  $T_{\text{Postop 18}}$  regardless of the ventilatory strategy (table 3). Use of the PV strategy also prevented the increase in EVLWI amount. The EVLWI amount and EVLWI/indexed intrathoracic blood volume ratio significantly increased at  $T_{\text{Postop 1}}$  in the CV group and were higher than in the PV group (fig. 4). In addition, EVLWI

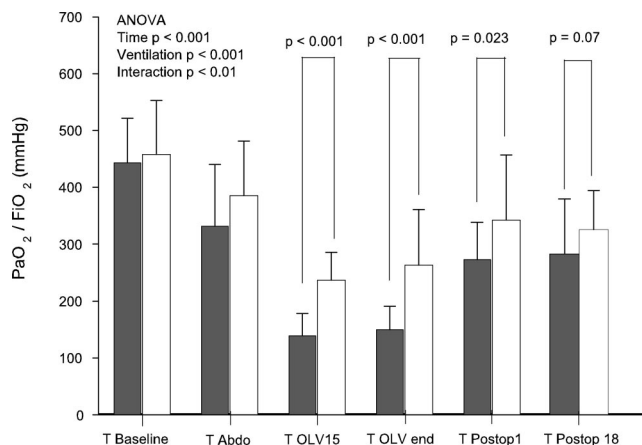

**Fig. 3.** Time course of arterial oxygen partial pressure/inspired oxygen fraction ratio ( $\text{PaO}_2/\text{FiO}_2$ ) in conventional ventilation group (gray bars) and protective ventilation group (white bars) at baseline ( $T_{\text{Baseline}}$ ), at the end of abdominal time ( $T_{\text{Abdo}}$ ), after 15 min of one-lung ventilation ( $T_{\text{OLV 15}}$ ), at the end of one-lung ventilation time ( $T_{\text{OLV End}}$ ), and 1 h postoperatively ( $T_{\text{Postop 1}}$ ). Data are expressed as mean and SD. ANOVA = analysis of variance.  $T_{\text{Postop 18}}$  = 18 h postoperatively.

remained higher than baseline values at  $T_{\text{Postop 18}}$  in the CV group. There was no difference in type of fluid administered during the study protocol.

### Postoperative Outcome

The duration of postoperative mechanical ventilation from intensive care unit admission to extubation was shorter in the PV group (table 4). However, there was no difference between the two groups with regard to postoperative morbidity, intensive care duration of stay, or number of days alive discharged from the hospital at day 30 (table 4).

### Discussion

This study has shown that the reduction of  $V_T$  during OLV and the use of a PEEP of 5 cm  $\text{H}_2\text{O}$  during the overall ventilation period reduced the systemic proinflammatory response after esophagectomy. Better oxygenation and a shorter duration of postoperative ventilation were accomplished. Moreover, the use of this PV strategy was associated with a lower EVLWI increase.

The current study is the first to demonstrate that perioperative mechanical ventilation *per se* is an important factor in preventing part of the alterations in lung function and reducing the increase in plasmatic cytokine response in surgical patients without previous lung disease. Several studies have evaluated the impact of ventilatory strategies on inflammatory response and pulmonary function during major surgery.<sup>9,10,26</sup> In contrast to our findings, their results indicated that mechanical ventilation with high  $V_T$  and no PEEP did not result in higher cytokine levels when compared with strategies including a reduction of  $V_T$  associated with PEEP during major

Table 3. Respiratory and Hemodynamic Variables

|                                              | T <sub>Baseline</sub> |             | T <sub>Abdo</sub> |              | T <sub>OLV 15</sub> |               | T <sub>OLV End</sub> |               |
|----------------------------------------------|-----------------------|-------------|-------------------|--------------|---------------------|---------------|----------------------|---------------|
|                                              | CV                    | PV          | CV                | PV           | CV                  | PV            | CV                   | PV            |
| RR, V <sub>T</sub> /min                      | 12 ± 1                | 12 ± 1      | 12 ± 2            | 13 ± 2       | 12 ± 2              | 15 ± 3*†      | 12 ± 2               | 15 ± 3*†      |
| V <sub>T</sub> , ml                          | 565 ± 54              | 551 ± 77    | 561 ± 56          | 547 ± 64     | 563 ± 50            | 340 ± 41*†    | 560 ± 58             | 342 ± 38*†    |
| P <sub>plat</sub> , cm H <sub>2</sub> O      | 14 ± 3                | 14.5 ± 2    | 16 ± 3            | 16 ± 3       | 28 ± 3†             | 21 ± 3.5††    | 26 ± 3†              | 20 ± 3.5††    |
| Arterial pH                                  | 7.42 ± 0.04           | 7.41 ± 0.05 | 7.37 ± 0.03§      | 7.35 ± 0.08§ | 7.36 ± 0.1§         | 7.32 ± 0.04§* | 7.36 ± 0.05§         | 7.29 ± 0.07§* |
| P <sub>a</sub> CO <sub>2</sub> , mmHg        | 39 ± 6                | 39 ± 4      | 43 ± 4†           | 45 ± 6†      | 42 ± 4†             | 48 ± 9*†      | 43 ± 5†              | 49 ± 6*†      |
| MAP, mmHg                                    | 80 ± 11               | 74 ± 12     | 78 ± 10           | 81 ± 11      | 79 ± 11             | 75 ± 13       | 79 ± 13              | 78 ± 13       |
| HR, beats/min                                | 63 ± 14               | 62 ± 13     | 71 ± 14           | 68 ± 12      | 76 ± 13†            | 76 ± 14†      | 84 ± 15†             | 77 ± 17†      |
| CI, l · min <sup>-1</sup> · kg <sup>-1</sup> | 2.6 ± 0.7             | 2.7 ± 1.0   | —                 | —            | —                   | —             | 3.3 ± 1.0†           | 3.2 ± 1.1†    |

surgical procedures.<sup>10</sup> Nevertheless, the inflammatory response was studied in a nonhomogenic group of surgical procedures, and OLV was seldom used.<sup>9,10,26</sup> In contrast, our work has focused on one uniform surgical procedure performed by the same trained surgical team, which reinforced the comparability of groups.<sup>27</sup> More-

over, esophagectomy required left OLV, which, although limited in time, has been reported to promote ventilation-induced lung injury in both experimental and clinical settings with similar duration.<sup>5,15</sup> Although the exclusion of one lung and the use of OLV should theoretically include a reduction of V<sub>T</sub> to 5 ml/kg, the hypothetical risk of derecruitment and hypoventilation frequently promotes the maintenance of the same level as during two-lung ventilation without PEEP.<sup>13,14</sup> This type of mechanical ventilation may lead to overdistension of the remaining aerated lung regions and increase the shear forces generated during repetitive opening and collapse of atelectatic areas.<sup>15,28</sup> Furthermore, during OLV in lateral decubitus, the compression atelectasis of dependent lung regions, the loss of elastic recoil after thoracotomy, and mediastinal surgical manipulations can markedly reduce the aerated lung capacity, impair ventilation distribution, and worsen ventilation/perfusion mismatch.<sup>29-31</sup> Consequently and because potential benefit on inflammatory reaction with reduced V<sub>T</sub> during OLV has been reported in a recent experimental study,<sup>15</sup> a decrease in V<sub>T</sub> to 5 ml/kg was realized in the PV group. Based on previous results regarding the influence of PEEP during both two-lung<sup>32</sup> and one-lung ventilation,<sup>33</sup> a moderate level of PEEP was added in the PV group throughout the operative time. Because no previous clinical study about the influence of reduction of V<sub>T</sub> on the perioperative proinflammatory response has demonstrated any advantage during two-lung ventilation, the same level of 9 ml/kg was maintained in both groups during this period.<sup>9,10</sup>

Recent studies have demonstrated the clinical relevance of the proinflammatory cytokine response in the postoperative course of esophagectomy as predictive of cardiac or pulmonary complications such as acute respiratory distress syndrome.<sup>1,19,34</sup> The prolonged half-life of IL-6 and the related ease of detecting circulating level has made this cytokine a precious indicator of both duration and extent of surgical injury.<sup>1,3,19,20</sup> Moreover, because IL-6 seems to be a good marker of ventilator-induced injury,<sup>21,35</sup> this cytokine was chosen as the most reliable marker of the perioperative proinflammatory response in the studied setting. Because TNF-α, IL-1β, and IL-8 are

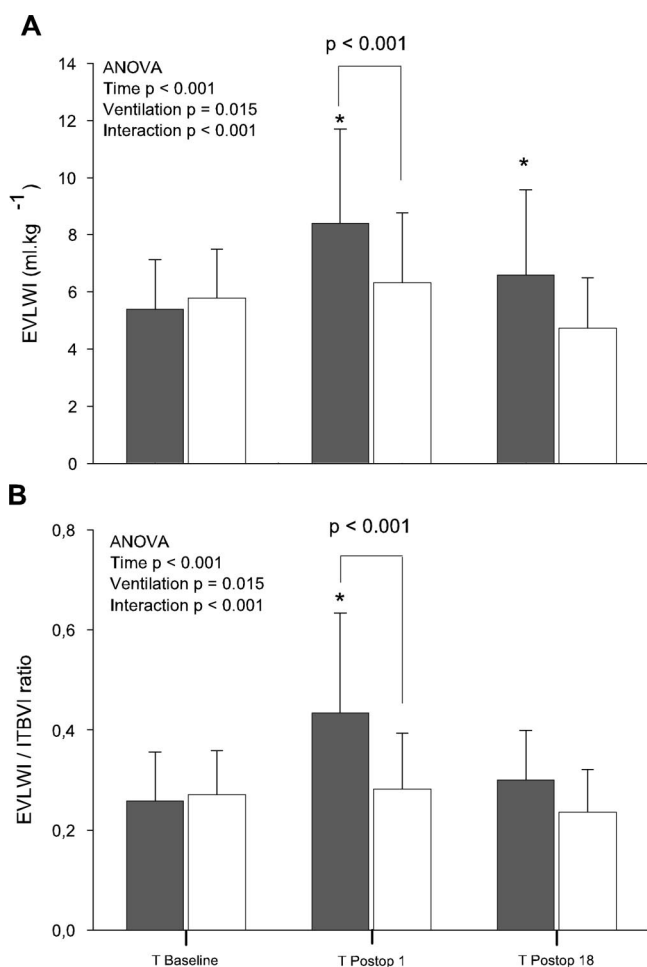

Fig. 4. Time course of extravascular lung water indexed to the body weight (EVLWI) (A) and EVLWI to intrathoracic blood volume indexed to the body weight (ITBVI) ratio (B) in conventional ventilation group (gray bars) and protective ventilation group (white bars) at baseline (T<sub>Baseline</sub>), 1 h postoperatively (T<sub>Postop 1</sub>), and 18 h postoperatively (T<sub>Postop 18</sub>). Data are expressed as mean and SD. \* *P* < 0.01 versus T<sub>Baseline</sub>. ANOVA = analysis of variance.

Table 3. (Continued)

|                                              | T <sub>Postop 1</sub> |              | T <sub>Postop 18</sub> |              | ANOVA   |             |             |
|----------------------------------------------|-----------------------|--------------|------------------------|--------------|---------|-------------|-------------|
|                                              | CV                    | PV           | CV                     | PV           | Time    | Ventilation | Interaction |
| RR, V <sub>T</sub> /min                      | 12 ± 2                | 13 ± 2       | —                      | —            | < 0.001 | < 0.05      | < 0.01      |
| V <sub>T</sub> , ml                          | 567 ± 55              | 542 ± 66     | —                      | —            | < 0.001 | < 0.05      | < 0.05      |
| Pplat, cm H <sub>2</sub> O                   | 19.5 ± 5†             | 19 ± 2†      | —                      | —            | < 0.001 | < 0.001     | < 0.001     |
| Arterial pH                                  | 7.34 ± 0.04§          | 7.32 ± 0.09§ | 7.34 ± 0.07§           | 7.36 ± 0.06§ | < 0.05  | < 0.01      | NS          |
| Paco <sub>2</sub> , mmHg                     | 39 ± 5                | 41 ± 5       | 43 ± 5†                | 42 ± 5†      | < 0.005 | < 0.01      | NS          |
| MAP, mmHg                                    | 85 ± 11               | 82 ± 14      | 76 ± 13                | 74 ± 14      | NS      | NS          | NS          |
| HR, beats/min                                | 94 ± 16†              | 94 ± 19†     | 81 ± 13†               | 80 ± 15†     | < 0.01  | NS          | NS          |
| CI, l · min <sup>-1</sup> · kg <sup>-1</sup> | 3.3 ± 0.9†            | 3.5 ± 1.2†   | 3.4 ± 0.7†             | 3.4 ± 0.9†   | < 0.001 | NS          | NS          |

Data are expressed as mean ± SD.

\*  $P < 0.01$  vs. conventional ventilation. †  $P < 0.01$  vs. T<sub>Baseline</sub>. ‡  $P < 0.001$  vs. conventional ventilation. §  $P < 0.05$  vs. T<sub>Baseline</sub>.

CI = cardiac index; CV = conventional ventilation; HR = heart rate; MAP = mean arterial pressure; Paco<sub>2</sub> = arterial blood carbon dioxide tension; Pplat = plateau airway pressure; PV = protective ventilation; RR = respiratory rate; T<sub>Abdo</sub> = end of abdominal time; T<sub>Baseline</sub> = baseline time; T<sub>OLV 15</sub> and T<sub>OLV End</sub> = 15 min after initiation and at the end of one-lung ventilation, respectively; T<sub>Postop 1</sub> and T<sub>Postop 18</sub> = 1 and 18 h after the end of the surgical procedure, respectively; V<sub>T</sub> = tidal volume.

equally implicated in the proinflammatory response, induced changes were also analyzed. However, there is evidence that these last are either rapidly cleared after the surgical injury with a related risk to miss the increase (TNF- $\alpha$  and IL-1 $\beta$ ) or released to a lesser extent (IL-8).<sup>2,20,36</sup> The changes in cytokine level that we observed in the CV group were in accord with previous studies especially for IL-6 and IL-8.<sup>20,37,38</sup> Conversely, the increases of IL-6 that we observed in the PV group were lower and closer to the ones reported after gastrectomy, a moderately stressed procedure.<sup>38</sup> The absence of TNF- $\alpha$  increase could be explained by the time points at which we sampled the blood. Indeed, the TNF- $\alpha$  level was shown to peak early, with a short half-life after the inflammatory hit.<sup>2</sup> Other explanations could be an early inactivation of TNF- $\alpha$  in the circulation,<sup>39</sup> a limited implication of this cytokine in this setting,<sup>40</sup> or both. The persistent elevation in proinflammatory cytokines (*i.e.*, IL-1 $\beta$ , IL-6, and IL-8) observed in the CV group suggests that this strategy may delay or preclude the resolution of the systemic inflammatory process. Indeed, although our

study protocol did not include the measurements of pulmonary cytokines, the influence of the ventilatory strategy on systemic cytokine levels that we observed is supported by previous data.<sup>11,15,41</sup> Recent experimental studies using normal lungs have shown a systemic cytokine response to injurious ventilatory strategies through a mechanotransduction mechanism, a loss of alveolar compartmentalization, or both.<sup>11,42-44</sup> It is likely that a CV strategy including a prolonged period of OLV may enhance the inflammatory response after major surgical procedures such as esophagectomy realizing a two-hit model. In this model, no factor by itself (*i.e.*, surgical procedure and mechanical ventilation) induces a sufficient effect, but the combination of both factors acts synergistically to cause the changes of the immune response.<sup>10</sup> This hypothesis has been suggested to explain ventilation-induced lung injury in acute respiratory distress syndrome patients<sup>45,46</sup> and, more recently, the alteration of the immune response in children without lung pathology undergoing mechanical ventilation.<sup>47</sup> Finally, our differences in cytokine levels have been ob-

Table 4. Postoperative Evolution of the Patients

|                                                       | Conventional Ventilation (n = 26) | Protective Ventilation (n = 26) | P Value |
|-------------------------------------------------------|-----------------------------------|---------------------------------|---------|
| Patient without morbid event, n                       | 9                                 | 12                              | 0.57    |
| Pneumonia, n                                          | 10                                | 6                               | 0.37    |
| Septic shock, n                                       | 6                                 | 4                               | 0.72    |
| ARDS, n                                               | 6                                 | 3                               | 0.30    |
| Supraventricular arrhythmia, n                        | 4                                 | 4                               | 1.00    |
| Myocardial ischaemia, n                               | 1                                 | 1                               | 1.00    |
| Renal failure, n                                      | 3                                 | 2                               | 1.00    |
| Anastomotic leak, n                                   | 2                                 | 1                               | 1.00    |
| Surgical reintervention, n                            | 1                                 | 3                               | 0.61    |
| Postoperative ventilation duration, min*              | 171 ± 57                          | 115 ± 38                        | < 0.001 |
| ICU duration of stay, days                            | 8 (5-14)                          | 4 (3-11)                        | 0.09    |
| Days alive and discharged from the hospital at day 30 | 3.9 ± 5.7                         | 5.1 ± 6.1                       | 0.32    |
| Postoperative mortality                               | 1                                 | 2                               | 1.00    |

Data are expressed as mean ± SD or median (interquartile range).

\* From intensive care unit (ICU) admission to extubation.

ARDS = acute respiratory distress syndrome; renal failure = serum creatinine > 300  $\mu$ M or need for hemofiltration.

served while the CV strategy was associated with plateau pressure not greater than 30 cm H<sub>2</sub>O. This result suggests that an injurious ventilatory strategy is not necessarily associated with increased pressure and that a benefit in reducing V<sub>T</sub> could be expected regardless of the plateau pressure before V<sub>T</sub> reduction as recently suggested for acute respiratory distress syndrome patients.<sup>48</sup>

Another relevant finding of this study was the contemporary association of an increase in extravascular lung water, pulmonary permeability, and cytokine peak levels. Increases both in pulmonary microvascular permeability and in plasmatic concentration of cytokines have been reported in patients who developed pulmonary insufficiencies such as acute lung injury and acute respiratory distress syndrome after esophagectomy.<sup>4,34</sup> Our results suggest that this phenomenon can be attenuated by a PV strategy. Such a limitation has been previously demonstrated in experimental models of two-lung<sup>43,49,50</sup> and one-lung ventilation<sup>15</sup> but never in clinical conditions with previously healthy lungs. The better preservation of oxygenation in the protective group could also be attributed to this limitation in EVLWI amount associated with less ventilation/perfusion mismatch.

Potential limitations worth consideration include the small number of patients studied in a single institution, limiting the generalizability of the conclusions. Moreover, because we did not measure cytokines in the alveolar space, a comparison between alveolar and plasmatic concentrations of these biomarkers could not be made. The PV strategy reduced the duration of postoperative mechanical ventilation. The influence of ventilation duration on the occurrence of postoperative pulmonary complications has been previously reported,<sup>51</sup> whereas the clinical relevance of our results (less than 1 h difference) could seem limited. Moreover, although the incidence of relevant postoperative complications was in accord with previous reports,<sup>5,52,53</sup> our results have not demonstrated significant difference between groups. However, this study was not powered for clinical endpoints, and further studies should be performed to assess the influence of such a strategy on clinical outcomes. Another limitation was the inability in determining the respective influence of each component of the protective strategy (*i.e.*, reduced V<sub>T</sub> and PEEP). We have previously demonstrated the influence of PEEP during OLV on alveolar recruitment and oxygenation preservation.<sup>33</sup> One can argue that this related effect of PEEP could rather explain the extubation being earlier than the reduction of V<sub>T</sub>. However, recent data suggest that lower plateau pressure and reduced V<sub>T</sub> are independently associated with a decrease in ventilator-induced lung injury.<sup>48</sup>

In summary, this study first demonstrates that mechanical ventilation strategy influences the proinflammatory systemic response during and after a complex surgical

procedure requiring a prolonged period of OLV. The beneficial effects of a PV strategy based on the reduction of V<sub>T</sub> during the OLV period associated with a moderate level of PEEP must be considered for high-risk surgical procedures such as esophagectomy.

## References

1. Kooguchi K, Kobayashi A, Kitamura Y, Ueno H, Urata Y, Onodera H, Hashimoto S: Elevated expression of inducible nitric oxide synthase and inflammatory cytokines in the alveolar macrophages after esophagectomy. *Crit Care Med* 2002; 30:71-6
2. Lin E, Calvano S, Lowry S: Inflammatory cytokines and cell response in surgery. *Surgery* 2000; 127:117-26
3. Yamada T, Hisanaga M, Nakajima Y, Kanehiro H, Watanabe A, Ohyama T, Nishio K, Sho M, Nagao M, Harada A, Matsushima K, Nakano H: Serum interleukin-6, interleukin-8, hepatocyte growth factor and nitric oxide changes during thoracic surgery. *World J Surg* 1998; 22:783-90
4. Katsuta T, Saito T, Shigemitsu Y, Kinoshita T, Shiraishi N, Kitano S: Relation between tumour necrosis factor alpha and interleukin 1beta producing capacity of peripheral monocytes and pulmonary complications following oesophagectomy. *Br J Surg* 1998; 85:548-53
5. Tandon S, Batchelor A, Bullock R, Gascoigne A, Griffin M, Hayes N, Hing J, Shaw I, Warnell I, Baudouin SV: Peri-operative risk factors for acute lung injury after elective oesophagectomy. *Br J Anaesth* 2001; 86:633-8
6. Ranieri VM, Mascia L, Fiore T, Bruno F, Brienza A, Giuliani R: Cardiorespiratory effects of positive end-expiratory pressure during progressive tidal volume reduction (permissive hypercapnia) in patients with acute respiratory distress syndrome. *ANESTHESIOLOGY* 1995; 83:710-20
7. Stuber F, Wrigge H, Schroeder S, Wetegrove S, Zinserling J, Hoeft A, Putensen C: Kinetic and reversibility of mechanical ventilation-associated pulmonary and systemic inflammatory response in patients with acute lung injury. *Intensive Care Med* 2002; 28:834-41
8. ARDS Network: Ventilation with lower tidal volumes as compared with traditional tidal volumes for acute lung injury and the acute respiratory distress syndrome. *N Engl J Med* 2000; 342:1301-8
9. Wrigge H, Zinserling J, Stuber F, von Spiegel T, Hering R, Wetegrove S, Hoeft A, Putensen C: Effects of mechanical ventilation on release of cytokines into systemic circulation in patients with normal pulmonary function. *ANESTHESIOLOGY* 2000; 93:1413-7
10. Wrigge H, Uhlig U, Zinserling J, Behrends-Callsen E, Ottersbach G, Fischer M, Uhlig S, Putensen C: The effects of different ventilatory settings on pulmonary and systemic inflammatory responses during major surgery. *Anesth Analg* 2004; 98:775-81
11. Bregeon F, Roch A, Delpierre S, Ghigo E, Auttillo-Touati A, Kajikawa O, Martin T, Pugin J, Portugal H, Auffray J, Jammes Y: Conventional mechanical ventilation of healthy lungs induced pro-inflammatory cytokine gene transcription. *Respir Physiol Neurobiol* 2002; 132:191-203
12. Bregeon F, Delpierre S, Chetaille B, Kajikawa O, Martin T, Auttillo-Touati A, Jammes Y, Pugin J: Mechanical ventilation affects lung function and cytokine production in an experimental model of endotoxemia. *ANESTHESIOLOGY* 2005; 102:331-9
13. Benumof J: Conventional and differential lung management of one-lung ventilation. *Anesthesia for Thoracic Surgery*, 2nd edition. Philadelphia, Saunders, 1994, pp 413-24
14. Brodsky J, Fitzmaurice B: Modern anesthetic techniques for thoracic operations. *World J Surg* 2001; 25:162-6
15. Gama de Abreu M, Heintz M, Heller A, Széchenyi R, Albrecht D, Koch T: One-lung ventilation with high tidal volumes and zero positive end-expiratory pressure is injurious in the isolated rabbit lung model. *Anesth Analg* 2003; 96:220-8
16. Mannino D: Chronic obstructive pulmonary disease: Definition and epidemiology. *Respir Care* 2003; 48:1185-91
17. Thomas P, Doddoli C, Lienne P, Morati N, Thirion X, Garbe L, Giudicelli R, Fuentes P: Changing patterns and surgical results in adenocarcinoma of the oesophagus. *Br J Surg* 1997; 84:119-25
18. Ohga T, Kimura Y, Futatsugi M, Miyasaki M, Sacki H, Nozoe T: Surgical and oncological advances in the treatment of esophageal cancer. *Surgery* 2002; 131:S28-34
19. Abe T, Oka M, Tangoku A, Hayashi H, Yamamoto K, Yahara N, Morita K, Tabata T, Ohmoto Y: Interleukin-6 production in lung tissue after transthoracic esophagectomy. *J Am Coll Surg* 2001; 192:322-9
20. Nakazawa K, Narumi Y, Ishikawa S, Yokoyama K, Nishikage T, Nagai K, Kawano T, Makita K: Effect of prostaglandin E1 on inflammatory responses and gas exchange in patients undergoing surgery for oesophageal cancer. *Br J Anaesth* 2004; 93:199-203
21. von Bethmann A, Brasch F, Nusing R, Vogt K, Volk H, Muller K, Wendel A, Uhlig S: Hyperventilation induces release of cytokines from perfused mouse lung. *Am J Respir Crit Care Med* 1998; 157:263-72



22. Matejovic M, Krouzecky A, Rokyta R, Novak I: Fluid challenge in patients at risk for fluid loading-induced pulmonary edema. *Acta Anaesthesiol Scand* 2004; 48:69-73
23. Godje O, Peyerl M, Seebauer T, Dewald O, Reichart B: Reproducibility of double indicator dilution measurements of intrathoracic blood volume compartments, extravascular lung water, and liver function. *Chest* 1998; 113:1070-7
24. Boldt J, Ducke M, Kumle B, Papsdorf M, Zurmeyer E: Influence of different volume replacement strategies on inflammation and endothelial activation in the elderly undergoing major abdominal surgery. *Intensive Care Med* 2004; 30:416-22
25. Biffl W, Moore E, Moore F, Peterson V: Interleukin-6 in the injured patient: Marker of injury or mediator of inflammation? *Ann Surg* 1996; 224:647-64
26. Koner O, Celebi S, Balci H, Cetin G, Karaoglu K, Cakar N: Effects of protective and conventional mechanical ventilation on pulmonary function and systemic cytokine release after cardiopulmonary bypass. *Intensive Care Med* 2004; 30:620-6
27. Swisher SG, Deford L, Merriman KW, Walsh GL, Smythe R, Vaporician A, Ajani JA, Brown T, Komaki R, Roth JA, Putnam JB: Effect of operative volume on morbidity, mortality, and hospital use after esophagectomy for cancer. *J Thorac Cardiovasc Surg* 2000; 119:1126-32
28. Parker J, Hernandez L, Peevy K: Mechanisms of ventilator-induced lung injury. *Crit Care Med* 1993; 21:131-43
29. Brismar B, Hedenstierna G, Lundquist H, Strandberg A, Svensson L, Tokics L: Pulmonary densities during anesthesia with muscular relaxation, a proposal of atelectasis. *ANESTHESIOLOGY* 1985; 62:422-8
30. Hedenstierna G, Tokics L, Strandberg A, Lundquist H, Brismar B: Correlation of gas exchange impairment to development of atelectasis during anaesthesia and muscle paralysis. *Acta Anaesthesiol Scand* 1986; 30:183-91
31. Klingstedt C, Hedenstierna G, Bachrendtz S, Lundqvist H, Strandberg A, Tokics L, Brismar B: Ventilation-perfusion relationships and atelectasis formation in the supine and lateral positions during conventional mechanical and differential ventilation. *Acta Anaesthesiol Scand* 1990; 34:421-9
32. Hedenstierna G, Rothen HU: Atelectasis formation during anesthesia: causes and measures to prevent it. *J Clin Monit Comput* 2000; 16:329-35
33. Michelet P, Roch A, Brousse D, D'Journo X, Bregeon F, Lambert D, Perrin G, Papazian L, Thomas P, Carpentier J, Auffray J: Effects of PEEP on oxygenation and respiratory mechanics during one-lung ventilation. *Br J Anaesth* 2005; 95:267-73
34. Tsukada K, Hasegawa T, Miyazaki T, Katoh H, Yoshikawa M, Masuda N, Kuwano H: Predictive value of interleukin-8 and granulocyte elastase in pulmonary complication after esophagectomy. *Am J Surg* 2001; 181:167-71
35. Dreyfuss D, Rouby J: Mechanical ventilation-induced lung release of cytokines: A key for the future or Pandora's box? *ANESTHESIOLOGY* 2004; 101:1-3
36. Yamauchi H, Kobayashi E, Yoshida T, Kiyosaki H, Hozumi Y, Kohiyama R, Suminaga Y, Sakurabayashi I, Fujimura A, Miyata M: Changes in immune-endocrine response after surgery. *Cytokine* 1998; 10:549-54
37. Nakanishi K, Takeda S, Terajima K, Takano T, Ogawa R: Myocardial dysfunction associated with proinflammatory cytokines after esophageal resection. *Anesth Analg* 2000; 91:270-5
38. Tashiro T, Yamamori H, Takagi K, Hayashi N, Furukawa K, Nitta H, Toyoda Y, Sano W, Itabashi T, Nishiya K, Hirano J, Nakajima N: Changes in immune function following surgery for esophageal carcinoma. *Nutrition* 1999; 15:760-6
39. Pugin J, Verghese G, Widmer M, Matthay M: The alveolar space is the site of intense inflammatory and profibrotic reactions in the early phase of acute respiratory distress syndrome. *Crit Care Med* 1999; 27:304-12
40. Imanaka H, Shimaoka M, Matsuura N, Nishimura M, Ohta N, Kiyono H: Ventilator-induced lung injury is associated with neutrophil infiltration, macrophage activation, and TGF-beta 1 mRNA upregulation in rat lungs. *Anesth Analg* 2001; 92:428-36
41. Tremblay L, Valenza F, Ribeiro SP, Li J, Slutsky AS: Injurious ventilatory strategies increase cytokines and c-fos mRNA expression in an isolated rat lung model. *J Clin Invest* 1997; 99:944-52
42. Tremblay LN, Slutsky AS: Ventilator-induced injury: From barotrauma to biotrauma. *Proc Assoc Am Physicians* 1998; 110:482-8
43. Haitsma JJ, Uhlig S, Goggel R, Verbrugge SJ, Lachmann U, Lachmann B: Ventilator-induced lung injury leads to loss of alveolar and systemic compartmentalization of tumor necrosis factor-alpha. *Intensive Care Med* 2000; 26:1515-22
44. von Bethmann AN, Brasch F, Nusing R, Vogt K, Volk HD, Muller KM, Wendel A, Uhlig S: Hyperventilation induces release of cytokines from perfused mouse lung. *Am J Respir Crit Care Med* 1998; 157:263-72
45. Slutsky AS: Lung injury caused by mechanical ventilation. *Chest* 1999; 116:98-155
46. Ranieri VM, Suter PM, Tortorella C, De Tullio R, Dayer JM, Brienza A, Bruno F, Slutsky AS: Effect of mechanical ventilation on inflammatory mediators in patients with acute respiratory distress syndrome: A randomized controlled trial. *JAMA* 1999; 282:54-61
47. Plotz FB, Vreugdenhil HA, Slutsky AS, Zijlstra J, Heijnen CJ, van Vught H: Mechanical ventilation alters the immune response in children without lung pathology. *Intensive Care Med* 2002; 28:486-92
48. Hager D, Krishnan J, Hayden D, Brower R, Network ACT: Tidal volume reduction in patients with acute lung injury when plateau pressure are not high. *Am J Respir Crit Care Med* 2005; 172:1241-45
49. Valenza F, Guglielmi M, Irace M, Porro GA, Sibilla S, Gattinoni L: Positive end-expiratory pressure delays the progression of lung injury during ventilator strategies involving high airway pressure and lung overdistention. *Crit Care Med* 2003; 31:1993-8
50. Herrera MT, Toledo C, Valladares F, Muros M, Diaz-Flores L, Flores C, Villar J: Positive end-expiratory pressure modulates local and systemic inflammatory responses in a sepsis-induced lung injury model. *Intensive Care Med* 2003; 29:1345-53
51. Stephan F, Boucheseiche S, Hollande J, Flahault A, Cheffi A, Bazelly B, Bonnet F: Pulmonary complications following lung resection: A comprehensive analysis of incidence and possible risk factors. *Chest* 2000; 118:1263-70
52. Avendano CE, Flume PA, Silvestri GA, King LB, Reed CE: Pulmonary complications after esophagectomy. *Ann Thorac Surg* 2002; 73:922-6
53. Ferguson M, Durkin A: Pre-operative prediction of the risk of pulmonary complications after esophagectomy for cancer. *J Thorac Cardiovasc Surg* 2002; 123:661-9
